# Supplementary material for: Robust Estimation Methods Used to Study the Reasons behind Increasing Divorce Cases in Saudi Society
Source: Hindawi journal article supplement (doi:10.1155/2021/4027599), 2021-08-11
Supplement: f1 [file 4027599.f1.pdf]

|    |    |    |    |    |    |    |    |    |    |
|----|----|----|----|----|----|----|----|----|----|
| 47 | 1  | 1  | 1  | 1  | 1  | 1  | 1  | 1  | 1  |
| 48 | -1 | -1 | 1  | -1 | 1  | 1  | -1 | 1  | 1  |
| 49 | 1  | 1  | 1  | 1  | 1  | 1  | -1 | 1  | 1  |
| 50 | 1  | -1 | 1  | -1 | 1  | 1  | -1 | -1 | -1 |
| 51 | -1 | -1 | 1  | -1 | 1  | 1  | -1 | 1  | 1  |
| 52 | -1 | -1 | 1  | -1 | 1  | -1 | 1  | 1  | 1  |
| 53 | 1  | -1 | 1  | -1 | 1  | 1  | -1 | -1 | -1 |
| 54 | 1  | 1  | 1  | 1  | 1  | 1  | 1  | 1  | 1  |
| 55 | -1 | -1 | -1 | -1 | 1  | -1 | 1  | -1 | 1  |
| 56 | 1  | 1  | 1  | 1  | 1  | -1 | -1 | -1 | 1  |
| 57 | 1  | 1  | 1  | 1  | 1  | 1  | 1  | 1  | 1  |
| 58 | 1  | 1  | 1  | 1  | 1  | 1  | -1 | 1  | 1  |
| 59 | -1 | -1 | -1 | 1  | 1  | -1 | -1 | 1  | 1  |
| 60 | -1 | 1  | 1  | -1 | 1  | 1  | -1 | -1 | 1  |
| 61 | 1  | -1 | -1 | -1 | 1  | -1 | -1 | -1 | 1  |
| 62 | -1 | -1 | 1  | -1 | 1  | -1 | -1 | -1 | -1 |
| 63 | 1  | 1  | 1  | -1 | 1  | -1 | -1 | -1 | -1 |
| 64 | -1 | -1 | 1  | -1 | 1  | 1  | -1 | 1  | 1  |
| 65 | 1  | 1  | 1  | -1 | -1 | 1  | -1 | 1  | -1 |
| 66 | -1 | -1 | 1  | -1 | 1  | -1 | -1 | 1  | 1  |
| 67 | 1  | -1 | 1  | 1  | 1  | 1  | -1 | 1  | 1  |
| 68 | 1  | 1  | 1  | 1  | 1  | 1  | 1  | 1  | 1  |
| 69 | -1 | 1  | 1  | 1  | 1  | 1  | 1  | 1  | -1 |
| 70 | -1 | 1  | -1 | 1  | 1  | 1  | -1 | 1  | 1  |
| 71 | 1  | -1 | 1  | -1 | -1 | -1 | 1  | 1  | 1  |
| 72 | 1  | 1  | 1  | -1 | 1  | 1  | 1  | 1  | 1  |
| 73 | -1 | -1 | -1 | 1  | 1  | -1 | -1 | -1 | -1 |
| 74 | 1  | 1  | 1  | -1 | 1  | 1  | -1 | 1  | -1 |
| 75 | 1  | 1  | 1  | 1  | 1  | 1  | 1  | 1  | 1  |
| 76 | -1 | 1  | 1  | -1 | 1  | -1 | -1 | 1  | -1 |
| 77 | -1 | -1 | -1 | -1 | -1 | -1 | -1 | -1 | -1 |
| 78 | 1  | 1  | 1  | 1  | 1  | -1 | -1 | 1  | 1  |
| 79 | -1 | 1  | -1 | 1  | 1  | -1 | 1  | 1  | 1  |
| 80 | 1  | 1  | 1  | 1  | 1  | 1  | 1  | 1  | 1  |
| 81 | 1  | -1 | 1  | -1 | 1  | 1  | -1 | 1  | 1  |
| 82 | 1  | -1 | 1  | -1 | 1  | 1  | 1  | -1 | 1  |
| 83 | 1  | 1  | 1  | 1  | 1  | 1  | -1 | 1  | -1 |
| 84 | 1  | 1  | -1 | 1  | 1  | 1  | -1 | -1 | 1  |
| 85 | 1  | 1  | 1  | 1  | 1  | 1  | -1 | 1  | 1  |
| 86 | 1  | 1  | 1  | -1 | -1 | 1  | -1 | 1  | -1 |
| 87 | 1  | -1 | 1  | -1 | -1 | -1 | -1 | -1 | -1 |
| 88 | 1  | -1 | 1  | -1 | 1  | 1  | -1 | -1 | 1  |
| 89 | -1 | -1 | 1  | -1 | -1 | 1  | -1 | -1 | -1 |
| 90 | 1  | -1 | -1 | 1  | -1 | -1 | -1 | -1 | -1 |
| 91 | -1 | -1 | -1 | 1  | 1  | 1  | -1 | 1  | -1 |
| 92 | 1  | 1  | -1 | 1  | 1  | 1  | -1 | 1  | -1 |
| 93 | -1 | 1  | 1  | 1  | 1  | 1  | -1 | 1  | -1 |

|     |    |    |    |    |    |    |    |    |    |
|-----|----|----|----|----|----|----|----|----|----|
| 94  | -1 | 1  | 1  | 1  | 1  | 1  | 1  | 1  | 1  |
| 95  | 1  | -1 | -1 | -1 | -1 | -1 | -1 | -1 | -1 |
| 96  | -1 | -1 | -1 | -1 | -1 | -1 | -1 | -1 | 1  |
| 97  | -1 | 1  | 1  | -1 | 1  | -1 | -1 | 1  | -1 |
| 98  | -1 | 1  | 1  | 1  | 1  | 1  | -1 | 1  | 1  |
| 99  | -1 | -1 | -1 | 1  | 1  | 1  | -1 | -1 | 1  |
| 100 | 1  | -1 | 1  | 1  | 1  | 1  | -1 | 1  | 1  |
| 101 | 1  | 1  | 1  | -1 | 1  | -1 | -1 | -1 | -1 |
| 102 | -1 | 1  | 1  | 1  | 1  | -1 | -1 | -1 | 1  |
| 103 | -1 | 1  | -1 | -1 | -1 | -1 | -1 | -1 | -1 |
| 104 | -1 | -1 | -1 | 1  | 1  | 1  | -1 | 1  | 1  |
| 105 | -1 | -1 | -1 | 1  | 1  | -1 | -1 | -1 | -1 |
| 106 | 1  | 1  | 1  | 1  | 1  | 1  | -1 | 1  | 1  |
| 107 | 1  | 1  | 1  | -1 | 1  | 1  | -1 | 1  | -1 |
| 108 | 1  | 1  | 1  | -1 | -1 | 1  | -1 | 1  | -1 |
| 109 | 1  | 1  | 1  | 1  | 1  | 1  | 1  | -1 | -1 |
| 110 | 1  | 1  | 1  | 1  | 1  | 1  | 1  | 1  | -1 |
| 111 | -1 | -1 | -1 | -1 | 1  | 1  | 1  | -1 | 1  |
| 112 | 1  | 1  | -1 | -1 | 1  | 1  | -1 | -1 | 1  |
| 113 | 1  | 1  | 1  | 1  | 1  | 1  | 1  | 1  | 1  |
| 114 | 1  | -1 | 1  | 1  | 1  | 1  | 1  | 1  | 1  |
| 115 | 1  | -1 | -1 | 1  | 1  | -1 | -1 | -1 | 1  |
| 116 | 1  | 1  | 1  | 1  | 1  | 1  | -1 | -1 | -1 |
| 117 | -1 | -1 | -1 | 1  | 1  | -1 | 1  | -1 | -1 |
| 118 | 1  | 1  | 1  | 1  | 1  | 1  | 1  | 1  | 1  |
| 119 | -1 | 1  | 1  | 1  | 1  | 1  | -1 | 1  | 1  |
| 120 | -1 | 1  | -1 | -1 | 1  | 1  | -1 | 1  | -1 |
| 121 | -1 | 1  | 1  | 1  | 1  | 1  | -1 | 1  | 1  |
| 122 | 1  | -1 | 1  | 1  | 1  | -1 | -1 | -1 | 1  |
| 123 | 1  | 1  | 1  | 1  | -1 | 1  | -1 | 1  | 1  |
| 124 | 1  | 1  | 1  | 1  | 1  | 1  | -1 | 1  | -1 |
| 125 | -1 | -1 | -1 | 1  | -1 | -1 | -1 | -1 | -1 |
| 126 | 1  | 1  | 1  | 1  | 1  | 1  | -1 | 1  | 1  |
| 127 | -1 | -1 | -1 | 1  | 1  | -1 | -1 | -1 | -1 |
| 128 | 1  | 1  | 1  | -1 | -1 | -1 | -1 | 1  | 1  |
| 129 | -1 | 1  | 1  | -1 | -1 | -1 | 1  | -1 | -1 |
| 130 | -1 | 1  | 1  | -1 | -1 | -1 | 1  | -1 | -1 |
| 131 | 1  | 1  | 1  | -1 | 1  | 1  | -1 | 1  | 1  |
| 132 | 1  | 1  | 1  | 1  | 1  | 1  | 1  | 1  | 1  |
| 133 | -1 | -1 | -1 | -1 | -1 | -1 | -1 | -1 | -1 |
| 134 | 1  | 1  | 1  | 1  | 1  | -1 | -1 | 1  | 1  |
| 135 | -1 | -1 | -1 | 1  | -1 | -1 | -1 | -1 | -1 |
| 136 | 1  | -1 | 1  | 1  | -1 | 1  | -1 | 1  | -1 |
| 137 | -1 | 1  | 1  | 1  | 1  | 1  | -1 | 1  | -1 |
| 138 | -1 | 1  | 1  | 1  | 1  | 1  | -1 | -1 | -1 |
| 139 | -1 | 1  | 1  | 1  | 1  | 1  | -1 | 1  | -1 |
| 140 | 1  | 1  | 1  | -1 | 1  | 1  | -1 | -1 | -1 |

|     |    |    |    |    |    |    |    |    |    |
|-----|----|----|----|----|----|----|----|----|----|
| 141 | -1 | 1  | 1  | -1 | 1  | 1  | -1 | -1 | 1  |
| 142 | -1 | -1 | 1  | -1 | 1  | 1  | -1 | 1  | 1  |
| 143 | -1 | 1  | 1  | 1  | 1  | 1  | -1 | -1 | -1 |
| 144 | 1  | 1  | 1  | 1  | 1  | 1  | 1  | -1 | 1  |
| 145 | 1  | 1  | 1  | 1  | 1  | 1  | 1  | 1  | -1 |
| 146 | 1  | 1  | 1  | 1  | 1  | 1  | 1  | 1  | 1  |
| 147 | -1 | 1  | 1  | -1 | -1 | -1 | -1 | 1  | -1 |
| 148 | 1  | 1  | 1  | -1 | 1  | 1  | -1 | 1  | -1 |
| 149 | 1  | -1 | 1  | 1  | 1  | -1 | -1 | 1  | -1 |
| 150 | -1 | 1  | 1  | 1  | 1  | 1  | -1 | 1  | 1  |
| 151 | -1 | 1  | 1  | 1  | 1  | 1  | -1 | 1  | -1 |
| 152 | -1 | -1 | 1  | 1  | 1  | 1  | -1 | 1  | -1 |
| 153 | -1 | 1  | 1  | 1  | 1  | 1  | -1 | 1  | 1  |
| 154 | 1  | 1  | -1 | -1 | 1  | 1  | -1 | -1 | -1 |
| 155 | -1 | 1  | 1  | 1  | 1  | -1 | -1 | 1  | 1  |
| 156 | -1 | 1  | 1  | 1  | 1  | -1 | -1 | 1  | 1  |
| 157 | 1  | 1  | 1  | 1  | 1  | 1  | 1  | 1  | -1 |
| 158 | -1 | 1  | 1  | 1  | 1  | 1  | -1 | 1  | 1  |
| 159 | 1  | 1  | 1  | 1  | 1  | 1  | -1 | -1 | 1  |
| 160 | 1  | -1 | 1  | -1 | 1  | 1  | -1 | 1  | 1  |
| 161 | -1 | -1 | -1 | 1  | 1  | 1  | -1 | 1  | -1 |
| 162 | -1 | -1 | -1 | -1 | -1 | -1 | -1 | -1 | -1 |
| 163 | 1  | 1  | 1  | -1 | 1  | 1  | -1 | 1  | -1 |
| 164 | 1  | 1  | 1  | 1  | 1  | 1  | -1 | 1  | -1 |
| 165 | 1  | -1 | 1  | 1  | 1  | 1  | -1 | 1  | 1  |
| 166 | -1 | 1  | 1  | 1  | 1  | 1  | -1 | 1  | -1 |
| 167 | 1  | 1  | 1  | 1  | 1  | 1  | -1 | 1  | 1  |
| 168 | -1 | -1 | 1  | 1  | 1  | 1  | -1 | -1 | 1  |
| 169 | 1  | 1  | 1  | 1  | 1  | 1  | 1  | 1  | 1  |
| 170 | -1 | 1  | -1 | -1 | -1 | 1  | -1 | -1 | -1 |
| 171 | 1  | -1 | 1  | 1  | 1  | 1  | -1 | 1  | 1  |
| 172 | -1 | -1 | -1 | 1  | 1  | -1 | -1 | -1 | 1  |
| 173 | -1 | -1 | -1 | -1 | -1 | -1 | -1 | -1 | -1 |
| 174 | 1  | 1  | -1 | 1  | 1  | 1  | 1  | -1 | 1  |
| 175 | -1 | -1 | 1  | 1  | 1  | 1  | -1 | -1 | 1  |
| 176 | -1 | -1 | 1  | -1 | 1  | 1  | -1 | 1  | 1  |
| 177 | -1 | 1  | 1  | 1  | 1  | 1  | -1 | 1  | -1 |
| 178 | 1  | 1  | 1  | 1  | 1  | 1  | -1 | -1 | 1  |
| 179 | 1  | 1  | 1  | 1  | 1  | 1  | -1 | -1 | -1 |
| 180 | 1  | 1  | -1 | -1 | -1 | -1 | -1 | -1 | -1 |
| 181 | 1  | -1 | -1 | 1  | 1  | -1 | 1  | 1  | -1 |
| 182 | -1 | 1  | 1  | -1 | -1 | -1 | -1 | 1  | -1 |
| 183 | -1 | 1  | 1  | -1 | 1  | 1  | -1 | 1  | 1  |
| 184 | -1 | 1  | 1  | 1  | 1  | -1 | 1  | 1  | 1  |
| 185 | 1  | 1  | 1  | 1  | 1  | 1  | 1  | 1  | 1  |
| 186 | 1  | 1  | -1 | 1  | 1  | -1 | -1 | -1 | 1  |
| 187 | 1  | 1  | 1  | 1  | 1  | -1 | 1  | 1  | -1 |



|     |    |    |    |    |    |    |    |    |    |
|-----|----|----|----|----|----|----|----|----|----|
| 235 | 1  | -1 | 1  | -1 | 1  | 1  | -1 | 1  | 1  |
| 236 | 1  | 1  | 1  | 1  | 1  | -1 | -1 | -1 | -1 |
| 237 | 1  | 1  | 1  | 1  | 1  | 1  | 1  | -1 | 1  |
| 238 | -1 | 1  | -1 | 1  | 1  | 1  | -1 | -1 | -1 |
| 239 | 1  | 1  | 1  | -1 | -1 | 1  | -1 | -1 | -1 |
| 240 | -1 | -1 | 1  | 1  | 1  | -1 | -1 | 1  | 1  |
| 241 | 1  | -1 | 1  | 1  | 1  | 1  | -1 | -1 | -1 |
| 242 | 1  | 1  | 1  | 1  | -1 | 1  | -1 | 1  | 1  |
| 243 | 1  | -1 | 1  | 1  | 1  | 1  | 1  | 1  | 1  |
| 244 | -1 | 1  | 1  | -1 | 1  | 1  | -1 | 1  | 1  |
| 245 | 1  | 1  | 1  | 1  | 1  | 1  | 1  | 1  | 1  |
| 246 | -1 | 1  | 1  | 1  | 1  | -1 | -1 | 1  | 1  |
| 247 | -1 | 1  | 1  | 1  | 1  | 1  | -1 | -1 | -1 |
| 248 | 1  | 1  | 1  | -1 | -1 | 1  | -1 | 1  | -1 |
| 249 | 1  | 1  | 1  | 1  | 1  | 1  | -1 | 1  | 1  |
| 250 | -1 | 1  | 1  | -1 | 1  | 1  | -1 | 1  | -1 |
| 251 | -1 | 1  | 1  | 1  | 1  | 1  | -1 | 1  | -1 |
| 252 | 1  | 1  | 1  | 1  | 1  | 1  | 1  | 1  | 1  |
| 253 | 1  | 1  | 1  | 1  | 1  | 1  | -1 | -1 | 1  |
| 254 | -1 | -1 | -1 | 1  | -1 | 1  | -1 | 1  | -1 |
| 255 | 1  | -1 | 1  | 1  | 1  | -1 | -1 | 1  | 1  |
| 256 | 1  | 1  | 1  | 1  | 1  | 1  | 1  | 1  | -1 |
| 257 | -1 | -1 | 1  | 1  | 1  | -1 | -1 | 1  | 1  |
| 258 | -1 | -1 | -1 | -1 | -1 | -1 | -1 | -1 | -1 |
| 259 | 1  | 1  | 1  | -1 | 1  | 1  | -1 | 1  | -1 |
| 260 | 1  | 1  | 1  | 1  | 1  | 1  | 1  | 1  | 1  |
| 261 | -1 | 1  | 1  | 1  | 1  | 1  | -1 | 1  | -1 |
| 262 | -1 | 1  | 1  | 1  | -1 | 1  | -1 | 1  | -1 |
| 263 | -1 | -1 | 1  | -1 | 1  | 1  | 1  | -1 | 1  |
| 264 | -1 | -1 | 1  | 1  | -1 | -1 | -1 | -1 | -1 |
| 265 | -1 | -1 | 1  | 1  | -1 | -1 | -1 | -1 | -1 |
| 266 | -1 | -1 | 1  | 1  | -1 | -1 | -1 | -1 | -1 |
| 267 | 1  | 1  | 1  | 1  | 1  | 1  | 1  | 1  | 1  |
| 268 | -1 | 1  | 1  | 1  | 1  | 1  | -1 | -1 | 1  |
| 269 | 1  | 1  | 1  | 1  | 1  | 1  | 1  | 1  | 1  |
| 270 | -1 | 1  | 1  | -1 | -1 | -1 | -1 | -1 | -1 |
| 271 | 1  | 1  | 1  | 1  | 1  | 1  | 1  | 1  | 1  |
| 272 | -1 | 1  | 1  | 1  | 1  | 1  | -1 | -1 | 1  |
| 273 | 1  | 1  | 1  | 1  | 1  | -1 | 1  | 1  | 1  |
| 274 | 1  | -1 | 1  | 1  | 1  | -1 | -1 | -1 | 1  |
| 275 | -1 | 1  | 1  | 1  | 1  | -1 | -1 | 1  | -1 |
| 276 | 1  | 1  | 1  | 1  | 1  | 1  | -1 | 1  | 1  |
| 277 | 1  | -1 | 1  | 1  | 1  | 1  | -1 | 1  | 1  |
| 278 | 1  | 1  | 1  | 1  | 1  | 1  | -1 | 1  | 1  |
| 279 | 1  | 1  | 1  | -1 | 1  | 1  | 1  | 1  | 1  |
| 280 | -1 | 1  | 1  | 1  | 1  | 1  | -1 | 1  | 1  |
| 281 | -1 | 1  | 1  | -1 | 1  | 1  | -1 | -1 | 1  |

|     |    |    |    |    |    |    |    |    |    |
|-----|----|----|----|----|----|----|----|----|----|
| 282 | 1  | 1  | 1  | 1  | 1  | 1  | -1 | 1  | 1  |
| 283 | -1 | 1  | 1  | 1  | 1  | 1  | -1 | 1  | 1  |
| 284 | 1  | 1  | 1  | 1  | 1  | 1  | 1  | 1  | 1  |
| 285 | -1 | 1  | 1  | 1  | 1  | 1  | -1 | 1  | -1 |
| 286 | 1  | 1  | 1  | -1 | 1  | 1  | -1 | 1  | -1 |
| 287 | -1 | 1  | 1  | 1  | 1  | 1  | 1  | 1  | 1  |
| 288 | -1 | 1  | 1  | 1  | 1  | 1  | -1 | 1  | 1  |
| 289 | 1  | 1  | 1  | -1 | 1  | 1  | -1 | -1 | -1 |
| 290 | 1  | -1 | 1  | 1  | 1  | -1 | -1 | -1 | -1 |
| 291 | -1 | 1  | 1  | 1  | 1  | -1 | -1 | -1 | 1  |
| 292 | 1  | -1 | 1  | 1  | 1  | 1  | 1  | 1  | 1  |
| 293 | 1  | 1  | 1  | 1  | 1  | 1  | -1 | 1  | 1  |
| 294 | 1  | 1  | 1  | 1  | 1  | 1  | -1 | 1  | 1  |
| 295 | -1 | 1  | -1 | -1 | -1 | 1  | -1 | 1  | 1  |
| 296 | -1 | -1 | 1  | 1  | 1  | 1  | -1 | -1 | 1  |
| 297 | 1  | 1  | 1  | 1  | 1  | 1  | -1 | 1  | 1  |
| 298 | 1  | 1  | 1  | 1  | 1  | 1  | -1 | 1  | 1  |
| 299 | 1  | 1  | 1  | 1  | 1  | 1  | 1  | 1  | 1  |
| 300 | 1  | 1  | 1  | 1  | 1  | 1  | -1 | 1  | 1  |
| 301 | -1 | 1  | 1  | 1  | 1  | 1  | -1 | -1 | 1  |
| 302 | 1  | 1  | 1  | 1  | 1  | 1  | -1 | 1  | 1  |
| 303 | 1  | 1  | 1  | -1 | 1  | 1  | -1 | -1 | 1  |
| 304 | 1  | 1  | 1  | 1  | 1  | 1  | -1 | 1  | 1  |
| 305 | 1  | 1  | 1  | 1  | 1  | 1  | 1  | 1  | 1  |
| 306 | 1  | -1 | 1  | 1  | 1  | 1  | -1 | 1  | -1 |
| 307 | 1  | 1  | 1  | -1 | 1  | 1  | 1  | 1  | 1  |
| 308 | 1  | 1  | 1  | 1  | 1  | 1  | -1 | 1  | -1 |
| 309 | 1  | 1  | 1  | 1  | 1  | 1  | -1 | 1  | 1  |
| 310 | -1 | 1  | 1  | -1 | -1 | 1  | -1 | 1  | 1  |
| 311 | -1 | 1  | 1  | -1 | 1  | 1  | -1 | 1  | 1  |
| 312 | -1 | -1 | 1  | 1  | 1  | -1 | 1  | 1  | 1  |
| 313 | 1  | 1  | 1  | 1  | 1  | 1  | -1 | 1  | 1  |
| 314 | -1 | 1  | 1  | 1  | 1  | 1  | -1 | -1 | 1  |
| 315 | 1  | -1 | 1  | 1  | 1  | -1 | -1 | -1 | 1  |
| 316 | 1  | 1  | 1  | 1  | -1 | 1  | 1  | 1  | 1  |
| 317 | -1 | 1  | 1  | 1  | 1  | 1  | 1  | 1  | -1 |
| 318 | 1  | 1  | 1  | 1  | 1  | -1 | -1 | -1 | -1 |
| 319 | 1  | 1  | -1 | 1  | 1  | 1  | -1 | 1  | 1  |
| 320 | 1  | 1  | 1  | 1  | 1  | 1  | -1 | 1  | 1  |
| 321 | 1  | -1 | -1 | 1  | -1 | -1 | -1 | -1 | 1  |
| 322 | -1 | 1  | 1  | 1  | 1  | 1  | 1  | -1 | 1  |
| 323 | 1  | 1  | 1  | 1  | 1  | 1  | -1 | 1  | 1  |
| 324 | -1 | -1 | -1 | -1 | -1 | -1 | -1 | -1 | -1 |
| 325 | 1  | 1  | 1  | 1  | 1  | 1  | -1 | 1  | 1  |
| 326 | -1 | 1  | 1  | -1 | -1 | 1  | -1 | 1  | -1 |
| 327 | 1  | 1  | 1  | -1 | -1 | 1  | -1 | 1  | -1 |
| 328 | -1 | 1  | 1  | -1 | 1  | 1  | 1  | 1  | 1  |







|     |    |    |    |    |    |    |    |    |    |
|-----|----|----|----|----|----|----|----|----|----|
| 423 | -1 | 1  | 1  | 1  | -1 | -1 | -1 | -1 | -1 |
| 424 | 1  | 1  | 1  | 1  | 1  | 1  | -1 | 1  | 1  |
| 425 | 1  | 1  | 1  | 1  | 1  | 1  | -1 | 1  | 1  |
| 426 | 1  | 1  | 1  | 1  | -1 | 1  | -1 | 1  | 1  |
| 427 | 1  | 1  | 1  | 1  | 1  | 1  | -1 | 1  | -1 |
| 428 | 1  | -1 | 1  | 1  | 1  | 1  | -1 | 1  | -1 |
| 429 | -1 | 1  | -1 | 1  | 1  | 1  | -1 | 1  | 1  |
| 430 | 1  | 1  | 1  | -1 | 1  | 1  | -1 | 1  | 1  |
| 431 | 1  | 1  | 1  | 1  | 1  | 1  | 1  | 1  | 1  |
| 432 | 1  | -1 | 1  | 1  | -1 | 1  | -1 | -1 | -1 |
| 433 | -1 | 1  | 1  | 1  | 1  | 1  | -1 | 1  | -1 |
| 434 | 1  | 1  | 1  | 1  | 1  | 1  | -1 | -1 | 1  |
| 435 | -1 | -1 | 1  | 1  | 1  | 1  | -1 | 1  | 1  |
| 436 | -1 | 1  | 1  | 1  | 1  | 1  | 1  | 1  | 1  |
| 437 | -1 | 1  | 1  | 1  | 1  | 1  | 1  | 1  | 1  |
| 438 | -1 | 1  | 1  | -1 | 1  | -1 | 1  | 1  | -1 |
| 439 | 1  | 1  | -1 | 1  | -1 | 1  | 1  | 1  | -1 |
| 440 | 1  | 1  | 1  | 1  | 1  | -1 | -1 | -1 | 1  |
| 441 | 1  | 1  | 1  | 1  | -1 | 1  | -1 | 1  | 1  |
| 442 | 1  | 1  | 1  | 1  | -1 | 1  | -1 | 1  | -1 |
| 443 | -1 | -1 | -1 | -1 | -1 | -1 | -1 | -1 | -1 |
| 444 | 1  | 1  | 1  | 1  | 1  | 1  | -1 | 1  | 1  |
| 445 | 1  | 1  | 1  | -1 | 1  | -1 | -1 | 1  | 1  |
| 446 | -1 | 1  | 1  | 1  | 1  | 1  | -1 | -1 | 1  |
| 447 | 1  | 1  | 1  | 1  | 1  | 1  | -1 | 1  | 1  |
| 448 | -1 | 1  | 1  | 1  | 1  | 1  | -1 | -1 | 1  |
| 449 | 1  | 1  | -1 | 1  | -1 | 1  | -1 | 1  | -1 |
| 450 | -1 | -1 | 1  | -1 | 1  | -1 | -1 | 1  | 1  |
| 451 | 1  | 1  | 1  | 1  | -1 | 1  | 1  | 1  | -1 |
| 452 | 1  | 1  | 1  | 1  | 1  | 1  | -1 | 1  | 1  |
| 453 | 1  | 1  | 1  | 1  | 1  | 1  | -1 | 1  | 1  |
| 454 | -1 | 1  | 1  | 1  | 1  | 1  | -1 | 1  | 1  |
| 455 | 1  | -1 | 1  | 1  | 1  | 1  | -1 | 1  | -1 |
| 456 | -1 | 1  | -1 | -1 | 1  | 1  | -1 | -1 | 1  |
| 457 | 1  | -1 | -1 | -1 | 1  | 1  | -1 | -1 | 1  |
| 458 | 1  | 1  | 1  | 1  | 1  | 1  | 1  | 1  | 1  |
| 459 | 1  | 1  | 1  | -1 | 1  | 1  | -1 | 1  | 1  |
| 460 | 1  | 1  | -1 | -1 | 1  | 1  | 1  | -1 | 1  |
| 461 | 1  | 1  | 1  | 1  | 1  | 1  | -1 | 1  | 1  |
| 462 | 1  | 1  | 1  | -1 | 1  | 1  | -1 | 1  | 1  |
| 463 | 1  | 1  | 1  | 1  | -1 | -1 | -1 | 1  | -1 |
| 464 | -1 | -1 | -1 | -1 | -1 | -1 | 1  | 1  | -1 |
| 465 | 1  | 1  | 1  | 1  | 1  | 1  | -1 | 1  | 1  |
| 466 | 1  | 1  | 1  | 1  | 1  | 1  | 1  | 1  | 1  |
| 467 | 1  | 1  | -1 | 1  | -1 | 1  | -1 | 1  | 1  |
| 468 | -1 | 1  | 1  | 1  | 1  | 1  | 1  | 1  | 1  |
| 469 | -1 | -1 | 1  | 1  | 1  | 1  | 1  | 1  | 1  |

|     |    |    |    |    |    |    |    |    |    |
|-----|----|----|----|----|----|----|----|----|----|
| 470 | -1 | 1  | 1  | 1  | 1  | 1  | 1  | 1  | 1  |
| 471 | 1  | -1 | -1 | 1  | 1  | 1  | -1 | -1 | 1  |
| 472 | 1  | -1 | 1  | 1  | 1  | -1 | -1 | 1  | 1  |
| 473 | 1  | -1 | 1  | 1  | 1  | -1 | -1 | 1  | 1  |
| 474 | 1  | 1  | 1  | 1  | 1  | 1  | -1 | -1 | 1  |
| 475 | -1 | -1 | -1 | 1  | 1  | 1  | -1 | 1  | 1  |
| 476 | 1  | 1  | 1  | 1  | 1  | 1  | 1  | 1  | 1  |
| 477 | 1  | 1  | 1  | 1  | 1  | 1  | -1 | 1  | 1  |
| 478 | -1 | 1  | 1  | 1  | 1  | 1  | -1 | 1  | 1  |
| 479 | 1  | 1  | 1  | 1  | 1  | 1  | -1 | 1  | 1  |
| 480 | -1 | 1  | 1  | 1  | 1  | 1  | -1 | 1  | 1  |
| 481 | 1  | 1  | 1  | 1  | 1  | 1  | -1 | 1  | 1  |
| 482 | -1 | -1 | 1  | -1 | 1  | -1 | -1 | 1  | -1 |
| 483 | -1 | 1  | 1  | 1  | 1  | -1 | -1 | -1 | -1 |
| 484 | 1  | 1  | 1  | 1  | 1  | 1  | -1 | 1  | 1  |
| 485 | -1 | 1  | 1  | 1  | 1  | 1  | -1 | -1 | 1  |
| 486 | 1  | -1 | 1  | -1 | 1  | 1  | -1 | -1 | 1  |
| 487 | 1  | 1  | 1  | -1 | -1 | 1  | -1 | 1  | -1 |
| 488 | 1  | 1  | 1  | -1 | 1  | -1 | -1 | 1  | -1 |
| 489 | -1 | 1  | -1 | 1  | 1  | 1  | -1 | 1  | -1 |
| 490 | 1  | 1  | 1  | 1  | -1 | 1  | -1 | 1  | -1 |
| 491 | 1  | 1  | 1  | 1  | 1  | -1 | -1 | 1  | 1  |
| 492 | -1 | 1  | 1  | -1 | 1  | 1  | -1 | 1  | 1  |
| 493 | 1  | 1  | -1 | 1  | 1  | 1  | -1 | 1  | 1  |
| 494 | 1  | 1  | 1  | 1  | 1  | 1  | 1  | 1  | 1  |
| 495 | -1 | 1  | 1  | 1  | 1  | -1 | -1 | 1  | 1  |
| 496 | 1  | 1  | 1  | 1  | 1  | 1  | 1  | 1  | 1  |
| 497 | 1  | 1  | 1  | -1 | 1  | 1  | -1 | 1  | -1 |
| 498 | -1 | 1  | 1  | 1  | 1  | 1  | 1  | 1  | 1  |
| 499 | -1 | 1  | 1  | 1  | 1  | 1  | 1  | 1  | 1  |
| 500 | -1 | 1  | 1  | 1  | 1  | 1  | -1 | -1 | 1  |
| 501 | 1  | -1 | -1 | -1 | -1 | -1 | -1 | -1 | -1 |
| 502 | 1  | 1  | 1  | -1 | 1  | 1  | -1 | 1  | -1 |
| 503 | 1  | 1  | 1  | 1  | 1  | 1  | -1 | 1  | 1  |
| 504 | 1  | -1 | -1 | -1 | -1 | -1 | -1 | -1 | -1 |
| 505 | 1  | 1  | -1 | 1  | 1  | 1  | -1 | 1  | -1 |
| 506 | 1  | 1  | 1  | 1  | 1  | -1 | -1 | 1  | 1  |
| 507 | -1 | 1  | 1  | 1  | 1  | 1  | -1 | -1 | 1  |
| 508 | 1  | 1  | 1  | 1  | 1  | 1  | -1 | 1  | 1  |
| 509 | 1  | 1  | 1  | -1 | 1  | 1  | -1 | 1  | 1  |
| 510 | 1  | 1  | 1  | 1  | 1  | 1  | 1  | 1  | 1  |
| 511 | 1  | 1  | 1  | 1  | 1  | 1  | 1  | 1  | 1  |
| 512 | 1  | 1  | 1  | 1  | 1  | 1  | -1 | 1  | 1  |
| 513 | 1  | 1  | 1  | -1 | 1  | 1  | -1 | 1  | 1  |
| 514 | -1 | 1  | 1  | -1 | 1  | 1  | -1 | 1  | 1  |
| 515 | 1  | 1  | 1  | 1  | 1  | 1  | -1 | 1  | 1  |
| 516 | -1 | -1 | 1  | 1  | 1  | 1  | -1 | -1 | -1 |

|     |    |    |    |    |    |    |    |    |    |
|-----|----|----|----|----|----|----|----|----|----|
| 517 | -1 | 1  | -1 | -1 | 1  | -1 | -1 | -1 | 1  |
| 518 | 1  | 1  | 1  | 1  | 1  | 1  | -1 | 1  | 1  |
| 519 | 1  | 1  | 1  | 1  | 1  | 1  | -1 | -1 | 1  |
| 520 | 1  | 1  | 1  | 1  | 1  | 1  | -1 | 1  | 1  |
| 521 | 1  | -1 | -1 | -1 | 1  | 1  | -1 | -1 | -1 |
| 522 | 1  | 1  | 1  | 1  | 1  | 1  | -1 | 1  | -1 |
| 523 | 1  | 1  | -1 | 1  | 1  | 1  | 1  | 1  | -1 |
| 524 | 1  | 1  | 1  | -1 | 1  | 1  | -1 | -1 | 1  |
| 525 | 1  | 1  | 1  | 1  | 1  | 1  | -1 | 1  | 1  |
| 526 | 1  | 1  | -1 | -1 | 1  | -1 | -1 | -1 | 1  |
| 527 | 1  | 1  | 1  | 1  | 1  | 1  | 1  | -1 | 1  |
| 528 | 1  | 1  | 1  | 1  | 1  | 1  | 1  | 1  | 1  |
| 529 | 1  | 1  | 1  | 1  | 1  | 1  | -1 | -1 | 1  |
| 530 | 1  | 1  | 1  | -1 | 1  | 1  | 1  | 1  | -1 |
| 531 | 1  | 1  | 1  | 1  | 1  | 1  | -1 | 1  | 1  |
| 532 | 1  | 1  | 1  | -1 | 1  | 1  | -1 | 1  | -1 |
| 533 | 1  | 1  | 1  | -1 | 1  | 1  | 1  | 1  | 1  |
| 534 | 1  | 1  | 1  | -1 | -1 | -1 | -1 | 1  | 1  |
| 535 | 1  | 1  | 1  | 1  | 1  | 1  | 1  | 1  | 1  |
| 536 | -1 | 1  | -1 | 1  | 1  | 1  | -1 | -1 | -1 |
| 537 | 1  | 1  | 1  | 1  | 1  | 1  | -1 | 1  | 1  |
| 538 | -1 | 1  | 1  | 1  | 1  | 1  | -1 | 1  | 1  |
| 539 | -1 | -1 | -1 | 1  | 1  | -1 | 1  | 1  | -1 |
| 540 | 1  | 1  | 1  | 1  | 1  | 1  | 1  | 1  | 1  |
| 541 | 1  | -1 | 1  | -1 | -1 | 1  | 1  | -1 | -1 |
| 542 | -1 | 1  | -1 | 1  | -1 | 1  | -1 | 1  | -1 |
| 543 | -1 | -1 | -1 | -1 | 1  | 1  | 1  | -1 | -1 |
| 544 | 1  | 1  | -1 | -1 | 1  | -1 | 1  | -1 | -1 |
| 545 | -1 | -1 | 1  | 1  | -1 | -1 | 1  | 1  | -1 |
| 546 | -1 | 1  | 1  | 1  | -1 | -1 | 1  | 1  | 1  |
| 547 | 1  | -1 | 1  | 1  | -1 | -1 | 1  | 1  | 1  |
| 548 | 1  | 1  | 1  | 1  | 1  | 1  | 1  | 1  | 1  |
| 549 | -1 | -1 | -1 | -1 | -1 | -1 | -1 | -1 | -1 |
| 550 | -1 | 1  | -1 | -1 | 1  | 1  | 1  | -1 | -1 |
| 551 | -1 | -1 | 1  | -1 | 1  | 1  | -1 | 1  | 1  |
| 552 | -1 | -1 | 1  | -1 | -1 | 1  | -1 | -1 | 1  |
| 553 | -1 | -1 | -1 | 1  | -1 | -1 | 1  | 1  | -1 |
| 554 | 1  | 1  | 1  | 1  | -1 | 1  | 1  | -1 | -1 |
| 555 | -1 | -1 | -1 | -1 | 1  | 1  | -1 | -1 | -1 |
| 556 | 1  | 1  | 1  | 1  | 1  | 1  | 1  | -1 | -1 |
| 557 | -1 | 1  | -1 | 1  | 1  | -1 | -1 | -1 | -1 |
| 558 | -1 | 1  | 1  | 1  | -1 | -1 | 1  | 1  | 1  |
| 559 | 1  | 1  | 1  | 1  | 1  | -1 | 1  | 1  | 1  |
| 560 | -1 | -1 | 1  | 1  | 1  | -1 | -1 | 1  | 1  |
| 561 | -1 | 1  | 1  | 1  | 1  | -1 | 1  | 1  | -1 |
| 562 | 1  | 1  | -1 | 1  | 1  | 1  | -1 | -1 | -1 |
| 563 | 1  | -1 | -1 | -1 | 1  | 1  | -1 | -1 | 1  |

|     |    |    |    |    |    |    |    |    |    |
|-----|----|----|----|----|----|----|----|----|----|
| 564 | -1 | -1 | 1  | -1 | -1 | -1 | -1 | 1  | 1  |
| 565 | -1 | -1 | 1  | 1  | 1  | 1  | -1 | 1  | 1  |
| 566 | 1  | -1 | 1  | 1  | 1  | -1 | -1 | -1 | -1 |
| 567 | 1  | 1  | 1  | 1  | 1  | 1  | -1 | 1  | 1  |
| 568 | 1  | 1  | 1  | 1  | 1  | 1  | -1 | 1  | 1  |
| 569 | 1  | 1  | -1 | 1  | 1  | 1  | -1 | 1  | 1  |
| 570 | 1  | -1 | -1 | -1 | -1 | -1 | -1 | -1 | -1 |
| 571 | 1  | 1  | 1  | 1  | 1  | 1  | -1 | 1  | 1  |
| 572 | 1  | -1 | 1  | 1  | -1 | 1  | 1  | 1  | -1 |
| 573 | 1  | 1  | -1 | 1  | -1 | 1  | -1 | 1  | 1  |
| 574 | -1 | -1 | -1 | 1  | -1 | 1  | -1 | -1 | -1 |
| 575 | 1  | 1  | 1  | 1  | 1  | 1  | -1 | 1  | 1  |
| 576 | -1 | -1 | 1  | 1  | 1  | -1 | -1 | 1  | 1  |
| 577 | 1  | 1  | 1  | 1  | 1  | 1  | -1 | -1 | 1  |
| 578 | 1  | 1  | 1  | 1  | 1  | 1  | 1  | 1  | 1  |
| 579 | -1 | -1 | -1 | 1  | 1  | 1  | -1 | -1 | 1  |
| 580 | 1  | -1 | 1  | 1  | 1  | 1  | -1 | -1 | 1  |
| 581 | 1  | -1 | 1  | -1 | 1  | -1 | 1  | 1  | -1 |
| 582 | 1  | -1 | 1  | 1  | 1  | 1  | -1 | -1 | -1 |
| 583 | -1 | -1 | 1  | -1 | 1  | -1 | 1  | 1  | 1  |
| 584 | 1  | 1  | 1  | 1  | 1  | 1  | -1 | -1 | 1  |
| 585 | -1 | 1  | 1  | -1 | -1 | 1  | -1 | 1  | 1  |
| 586 | -1 | -1 | -1 | -1 | -1 | 1  | 1  | 1  | -1 |
| 587 | 1  | 1  | 1  | 1  | 1  | 1  | -1 | 1  | 1  |
| 588 | 1  | -1 | 1  | 1  | 1  | 1  | 1  | 1  | 1  |
| 589 | 1  | 1  | 1  | 1  | 1  | 1  | -1 | 1  | 1  |
| 590 | -1 | -1 | 1  | -1 | -1 | -1 | 1  | -1 | 1  |
| 591 | 1  | -1 | -1 | 1  | -1 | 1  | -1 | 1  | -1 |
| 592 | 1  | -1 | -1 | -1 | -1 | 1  | 1  | 1  | -1 |
| 593 | 1  | 1  | 1  | 1  | 1  | 1  | 1  | -1 | -1 |
| 594 | -1 | -1 | -1 | 1  | 1  | -1 | 1  | 1  | -1 |
| 595 | -1 | 1  | 1  | -1 | 1  | 1  | -1 | -1 | 1  |
| 596 | -1 | -1 | -1 | -1 | -1 | 1  | 1  | 1  | 1  |
| 597 | 1  | 1  | 1  | 1  | -1 | 1  | -1 | -1 | -1 |
| 598 | -1 | -1 | -1 | -1 | 1  | 1  | -1 | -1 | 1  |
| 599 | -1 | -1 | -1 | 1  | 1  | 1  | 1  | 1  | 1  |
| 600 | -1 | 1  | 1  | -1 | -1 | 1  | 1  | -1 | 1  |
| 601 | -1 | -1 | 1  | 1  | -1 | 1  | -1 | -1 | 1  |
| 602 | 1  | -1 | -1 | -1 | -1 | 1  | -1 | -1 | -1 |
| 603 | -1 | -1 | -1 | 1  | 1  | 1  | 1  | 1  | 1  |
| 604 | -1 | -1 | -1 | 1  | 1  | 1  | 1  | 1  | -1 |
| 605 | -1 | -1 | 1  | 1  | 1  | 1  | -1 | -1 | -1 |
| 606 | 1  | -1 | -1 | -1 | -1 | 1  | 1  | 1  | 1  |
| 607 | -1 | 1  | -1 | -1 | 1  | 1  | 1  | -1 | 1  |
| 608 | -1 | 1  | 1  | -1 | -1 | -1 | 1  | 1  | -1 |
| 609 | -1 | -1 | 1  | 1  | -1 | 1  | 1  | -1 | -1 |
| 610 | -1 | -1 | -1 | 1  | 1  | 1  | 1  | -1 | -1 |

|     |    |    |    |    |    |    |    |    |    |
|-----|----|----|----|----|----|----|----|----|----|
| 611 | -1 | 1  | -1 | 1  | 1  | 1  | -1 | -1 | 1  |
| 612 | -1 | 1  | -1 | -1 | -1 | 1  | -1 | 1  | 1  |
| 613 | -1 | -1 | 1  | 1  | 1  | 1  | -1 | -1 | -1 |
| 614 | -1 | 1  | 1  | -1 | -1 | -1 | 1  | 1  | 1  |
| 615 | 1  | 1  | 1  | 1  | 1  | 1  | 1  | 1  | 1  |
| 616 | -1 | -1 | -1 | -1 | -1 | 1  | -1 | -1 | -1 |
| 617 | -1 | 1  | 1  | -1 | -1 | 1  | -1 | -1 | 1  |
| 618 | -1 | -1 | -1 | 1  | 1  | 1  | -1 | -1 | 1  |
| 619 | -1 | 1  | -1 | -1 | -1 | -1 | 1  | 1  | 1  |
| 620 | 1  | 1  | 1  | -1 | 1  | 1  | -1 | 1  | 1  |
| 621 | 1  | -1 | 1  | 1  | 1  | -1 | -1 | -1 | -1 |
| 622 | 1  | -1 | 1  | -1 | 1  | -1 | 1  | -1 | -1 |
| 623 | -1 | -1 | -1 | -1 | -1 | 1  | -1 | -1 | 1  |
| 624 | 1  | 1  | 1  | 1  | 1  | -1 | -1 | 1  | 1  |
| 625 | 1  | 1  | 1  | -1 | -1 | 1  | -1 | -1 | 1  |
| 626 | 1  | 1  | 1  | 1  | 1  | 1  | 1  | 1  | 1  |
| 627 | 1  | 1  | 1  | -1 | -1 | 1  | -1 | -1 | -1 |
| 628 | -1 | 1  | 1  | 1  | 1  | 1  | -1 | 1  | 1  |
| 629 | -1 | -1 | -1 | -1 | -1 | -1 | -1 | -1 | -1 |
| 630 | -1 | 1  | 1  | 1  | -1 | 1  | -1 | -1 | 1  |
| 631 | 1  | 1  | 1  | 1  | -1 | -1 | 1  | -1 | -1 |
| 632 | -1 | 1  | -1 | 1  | -1 | 1  | -1 | 1  | -1 |
| 633 | -1 | 1  | 1  | 1  | -1 | 1  | 1  | 1  | 1  |
| 634 | 1  | 1  | 1  | 1  | 1  | 1  | -1 | 1  | 1  |
| 635 | 1  | 1  | 1  | -1 | 1  | -1 | -1 | -1 | -1 |
| 636 | 1  | 1  | 1  | 1  | -1 | 1  | 1  | 1  | 1  |
| 637 | 1  | 1  | 1  | 1  | -1 | 1  | 1  | 1  | 1  |
| 638 | -1 | 1  | 1  | -1 | 1  | 1  | -1 | 1  | -1 |
| 639 | 1  | -1 | 1  | 1  | 1  | -1 | -1 | -1 | -1 |



|    |    |    |    |    |    |    |        |    |
|----|----|----|----|----|----|----|--------|----|
| 1  | 1  | 1  | 1  | 1  | 1  | 1  | 80000  | 47 |
| 1  | 1  | -1 | 1  | 1  | -1 | -1 | 50000  | 48 |
| -1 | 1  | 1  | 1  | 1  | 1  | -1 | 100000 | 49 |
| -1 | -1 | -1 | -1 | 1  | -1 | -1 | 80000  | 50 |
| -1 | 1  | 1  | 1  | 1  | -1 | -1 | 150000 | 51 |
| 1  | -1 | 1  | 1  | 1  | -1 | 1  | 50000  | 52 |
| -1 | -1 | 1  | 1  | 1  | 1  | -1 | 100000 | 53 |
| 1  | 1  | 1  | 1  | 1  | 1  | 1  | 80000  | 54 |
| 1  | 1  | 1  | 1  | 1  | -1 | -1 | 60000  | 55 |
| -1 | 1  | -1 | 1  | -1 | 1  | -1 | 70000  | 56 |
| 1  | 1  | 1  | 1  | 1  | 1  | 1  | 90000  | 57 |
| 1  | 1  | 1  | 1  | 1  | 1  | -1 | 80000  | 58 |
| 1  | 1  | 1  | 1  | 1  | -1 | 1  | 30000  | 59 |
| 1  | -1 | -1 | 1  | 1  | 1  | -1 | 80000  | 60 |
| -1 | 1  | 1  | 1  | 1  | 1  | -1 | 100000 | 61 |
| -1 | -1 | -1 | -1 | -1 | -1 | -1 | 50000  | 62 |
| 1  | 1  | 1  | 1  | 1  | 1  | -1 | 180000 | 63 |
| -1 | -1 | 1  | 1  | -1 | 1  | -1 | 80000  | 64 |
| -1 | -1 | 1  | 1  | -1 | 1  | -1 | 70000  | 65 |
| 1  | 1  | 1  | 1  | 1  | 1  | 1  | 300000 | 66 |
| -1 | -1 | 1  | 1  | 1  | -1 | -1 | 120000 | 67 |
| 1  | 1  | 1  | 1  | 1  | 1  | 1  | 50000  | 68 |
| 1  | -1 | 1  | 1  | -1 | 1  | -1 | 50000  | 69 |
| -1 | 1  | 1  | 1  | 1  | -1 | 1  | 150000 | 70 |
| 1  | 1  | 1  | 1  | 1  | -1 | 1  | 100000 | 71 |
| -1 | 1  | 1  | -1 | -1 | -1 | -1 | 300000 | 72 |
| -1 | -1 | 1  | -1 | 1  | -1 | -1 | 150000 | 73 |
| -1 | -1 | 1  | -1 | 1  | 1  | 1  | 200000 | 74 |
| -1 | 1  | 1  | 1  | 1  | 1  | -1 | 150000 | 75 |
| 1  | -1 | 1  | 1  | 1  | 1  | -1 | 70000  | 76 |
| -1 | 1  | 1  | 1  | 1  | -1 | -1 | 80000  | 77 |
| 1  | 1  | 1  | 1  | 1  | -1 | 1  | 100000 | 78 |
| 1  | 1  | -1 | 1  | -1 | -1 | 1  | 80000  | 79 |
| 1  | 1  | 1  | 1  | 1  | 1  | 1  | 90000  | 80 |
| -1 | -1 | 1  | 1  | 1  | 1  | -1 | 80000  | 81 |
| 1  | 1  | 1  | 1  | 1  | -1 | -1 | 100000 | 82 |
| -1 | -1 | 1  | -1 | -1 | 1  | -1 | 100000 | 83 |
| -1 | 1  | -1 | 1  | 1  | -1 | -1 | 150000 | 84 |
| -1 | -1 | 1  | 1  | 1  | 1  | -1 | 50000  | 85 |
| -1 | -1 | 1  | -1 | -1 | 1  | -1 | 150000 | 86 |
| 1  | 1  | -1 | 1  | -1 | 1  | -1 | 90000  | 87 |
| -1 | -1 | 1  | 1  | 1  | -1 | -1 | 50000  | 88 |
| -1 | -1 | 1  | -1 | 1  | -1 | -1 | 60000  | 89 |
| 1  | 1  | -1 | 1  | -1 | -1 | 1  | 100000 | 90 |
| -1 | 1  | 1  | 1  | 1  | 1  | -1 | 60000  | 91 |
| 1  | -1 | -1 | -1 | 1  | 1  | 1  | 200000 | 92 |
| 1  | 1  | -1 | 1  | 1  | 1  | 1  | 50000  | 93 |



|    |    |    |    |    |    |    |        |     |
|----|----|----|----|----|----|----|--------|-----|
| 1  | 1  | 1  | 1  | 1  | 1  | 1  | 100000 | 94  |
| -1 | 1  | -1 | 1  | 1  | 1  | -1 | 150000 | 95  |
| 1  | -1 | 1  | 1  | 1  | -1 | 1  | 120000 | 96  |
| 1  | 1  | 1  | 1  | 1  | 1  | -1 | 150000 | 97  |
| 1  | -1 | 1  | -1 | 1  | 1  | -1 | 60000  | 98  |
| 1  | -1 | 1  | -1 | 1  | 1  | 1  | 80000  | 99  |
| 1  | 1  | 1  | 1  | 1  | 1  | 1  | 150000 | 100 |
| 1  | -1 | -1 | 1  | 1  | 1  | -1 | 50000  | 101 |
| 1  | 1  | 1  | 1  | 1  | -1 | 1  | 100000 | 102 |
| 1  | -1 | 1  | -1 | 1  | 1  | 1  | 100000 | 103 |
| -1 | 1  | 1  | -1 | 1  | 1  | 1  | 120000 | 104 |
| 1  | -1 | 1  | -1 | 1  | -1 | 1  | 110000 | 105 |
| -1 | 1  | 1  | -1 | 1  | 1  | 1  | 100000 | 106 |
| -1 | 1  | -1 | -1 | 1  | 1  | -1 | 100000 | 107 |
| -1 | -1 | -1 | -1 | 1  | 1  | -1 | 80000  | 108 |
| 1  | -1 | -1 | -1 | 1  | -1 | -1 | 60000  | 109 |
| -1 | 1  | 1  | 1  | 1  | 1  | -1 | 100000 | 110 |
| 1  | -1 | 1  | 1  | -1 | 1  | -1 | 80000  | 111 |
| 1  | 1  | 1  | 1  | 1  | 1  | -1 | 200000 | 112 |
| -1 | -1 | 1  | -1 | -1 | 1  | -1 | 150000 | 113 |
| 1  | 1  | 1  | 1  | 1  | -1 | 1  | 150000 | 114 |
| -1 | -1 | 1  | 1  | 1  | -1 | -1 | 180000 | 115 |
| -1 | -1 | 1  | 1  | 1  | 1  | -1 | 200000 | 116 |
| 1  | 1  | -1 | -1 | 1  | -1 | -1 | 150000 | 117 |
| 1  | -1 | 1  | 1  | 1  | 1  | -1 | 100000 | 118 |
| -1 | 1  | 1  | 1  | 1  | 1  | -1 | 150000 | 119 |
| 1  | 1  | 1  | 1  | 1  | 1  | -1 | 150000 | 120 |
| -1 | 1  | -1 | -1 | 1  | 1  | -1 | 50000  | 121 |
| 1  | -1 | -1 | -1 | 1  | -1 | 1  | 150000 | 122 |
| 1  | 1  | 1  | 1  | 1  | 1  | -1 | 50000  | 123 |
| 1  | -1 | -1 | 1  | 1  | 1  | -1 | 70000  | 124 |
| 1  | -1 | -1 | -1 | -1 | -1 | -1 | 100000 | 125 |
| 1  | -1 | 1  | -1 | 1  | 1  | 1  | 50000  | 126 |
| 1  | -1 | 1  | -1 | 1  | -1 | -1 | 160000 | 127 |
| -1 | -1 | -1 | -1 | 1  | 1  | -1 | 120000 | 128 |
| 1  | 1  | 1  | 1  | 1  | -1 | 1  | 50000  | 129 |
| 1  | 1  | 1  | 1  | 1  | -1 | 1  | 50000  | 130 |
| 1  | -1 | -1 | 1  | 1  | 1  | -1 | 50000  | 131 |
| 1  | 1  | 1  | 1  | 1  | 1  | 1  | 200000 | 132 |
| -1 | 1  | -1 | -1 | -1 | -1 | -1 | 100000 | 133 |
| -1 | 1  | 1  | 1  | 1  | 1  | -1 | 200000 | 134 |
| 1  | 1  | 1  | -1 | 1  | -1 | -1 | 95000  | 135 |
| -1 | 1  | 1  | 1  | 1  | -1 | 1  | 60000  | 136 |
| 1  | 1  | 1  | 1  | 1  | 1  | 1  | 60000  | 137 |
| 1  | 1  | -1 | 1  | 1  | -1 | -1 | 100000 | 138 |
| 1  | 1  | 1  | -1 | 1  | 1  | -1 | 77000  | 139 |
| 1  | 1  | -1 | 1  | 1  | 1  | -1 | 50000  | 140 |



|    |    |    |    |    |    |    |        |     |
|----|----|----|----|----|----|----|--------|-----|
| 1  | 1  | 1  | 1  | 1  | 1  | 1  | 140000 | 188 |
| -1 | 1  | 1  | 1  | 1  | 1  | 1  | 90000  | 189 |
| -1 | 1  | 1  | 1  | 1  | 1  | 1  | 90000  | 190 |
| 1  | -1 | 1  | 1  | 1  | 1  | -1 | 80000  | 191 |
| -1 | -1 | 1  | 1  | -1 | 1  | -1 | 80000  | 192 |
| 1  | 1  | 1  | 1  | 1  | -1 | -1 | 150000 | 193 |
| 1  | -1 | -1 | -1 | 1  | 1  | -1 | 100000 | 194 |
| 1  | -1 | 1  | -1 | 1  | 1  | -1 | 60000  | 195 |
| 1  | 1  | 1  | 1  | 1  | 1  | -1 | 100000 | 196 |
| 1  | 1  | 1  | 1  | 1  | 1  | -1 | 150000 | 197 |
| -1 | 1  | 1  | 1  | 1  | -1 | -1 | 150000 | 198 |
| -1 | 1  | 1  | 1  | 1  | -1 | -1 | 100000 | 199 |
| -1 | -1 | 1  | 1  | 1  | 1  | -1 | 150000 | 200 |
| 1  | 1  | 1  | 1  | 1  | -1 | 1  | 50000  | 201 |
| 1  | 1  | 1  | -1 | -1 | 1  | -1 | 70000  | 202 |
| 1  | 1  | -1 | 1  | -1 | 1  | -1 | 100000 | 203 |
| -1 | 1  | -1 | 1  | 1  | 1  | -1 | 150000 | 204 |
| 1  | -1 | 1  | 1  | 1  | 1  | -1 | 300000 | 205 |
| 1  | 1  | 1  | 1  | 1  | 1  | 1  | 120000 | 206 |
| 1  | 1  | 1  | 1  | 1  | 1  | 1  | 10000  | 207 |
| 1  | 1  | 1  | 1  | 1  | 1  | -1 | 50000  | 208 |
| 1  | 1  | 1  | 1  | 1  | 1  | -1 | 50000  | 209 |
| 1  | -1 | 1  | 1  | 1  | -1 | -1 | 60000  | 210 |
| 1  | 1  | 1  | 1  | 1  | 1  | 1  | 50000  | 211 |
| -1 | 1  | 1  | 1  | 1  | 1  | 1  | 80000  | 212 |
| 1  | 1  | -1 | 1  | 1  | 1  | 1  | 50000  | 213 |
| 1  | -1 | -1 | 1  | 1  | 1  | -1 | 400000 | 214 |
| 1  | -1 | 1  | -1 | -1 | 1  | 1  | 200000 | 215 |
| -1 | 1  | 1  | -1 | 1  | 1  | 1  | 100000 | 216 |
| 1  | 1  | 1  | -1 | 1  | -1 | -1 | 100000 | 217 |
| 1  | -1 | 1  | -1 | 1  | 1  | 1  | 200000 | 218 |
| 1  | 1  | 1  | 1  | 1  | 1  | 1  | 50000  | 219 |
| 1  | 1  | 1  | 1  | 1  | 1  | -1 | 150000 | 220 |
| -1 | 1  | -1 | 1  | 1  | -1 | 1  | 30000  | 221 |
| 1  | -1 | -1 | 1  | 1  | 1  | 1  | 100000 | 222 |
| 1  | -1 | 1  | -1 | -1 | 1  | -1 | 150000 | 223 |
| 1  | -1 | 1  | 1  | -1 | -1 | -1 | 250000 | 224 |
| -1 | -1 | 1  | -1 | 1  | 1  | 1  | 200000 | 225 |
| 1  | 1  | 1  | 1  | 1  | 1  | 1  | 100000 | 226 |
| -1 | -1 | 1  | -1 | -1 | 1  | -1 | 100000 | 227 |
| 1  | 1  | -1 | -1 | 1  | 1  | -1 | 100000 | 228 |
| 1  | 1  | 1  | 1  | -1 | 1  | -1 | 60000  | 229 |
| -1 | 1  | 1  | 1  | 1  | -1 | -1 | 120000 | 230 |
| -1 | 1  | 1  | 1  | 1  | -1 | -1 | 150000 | 231 |
| 1  | 1  | 1  | 1  | -1 | 1  | 1  | 250000 | 232 |
| 1  | -1 | 1  | 1  | -1 | 1  | -1 | 50000  | 233 |
| 1  | 1  | 1  | 1  | 1  | 1  | 1  | 200000 | 234 |

|    |    |    |    |    |    |    |        |     |
|----|----|----|----|----|----|----|--------|-----|
| 1  | 1  | 1  | 1  | 1  | 1  | 1  | 150000 | 235 |
| 1  | 1  | 1  | 1  | 1  | -1 | 1  | 12000  | 236 |
| 1  | 1  | -1 | -1 | 1  | 1  | -1 | 240000 | 237 |
| 1  | 1  | 1  | 1  | 1  | 1  | -1 | 100000 | 238 |
| -1 | 1  | -1 | 1  | 1  | 1  | -1 | 25000  | 239 |
| 1  | -1 | 1  | 1  | 1  | -1 | -1 | 200000 | 240 |
| 1  | 1  | 1  | 1  | 1  | 1  | 1  | 130000 | 241 |
| 1  | -1 | 1  | 1  | 1  | 1  | 1  | 150000 | 242 |
| 1  | -1 | 1  | 1  | 1  | 1  | 1  | 200000 | 243 |
| 1  | 1  | 1  | 1  | 1  | 1  | -1 | 110000 | 244 |
| -1 | -1 | -1 | -1 | 1  | 1  | -1 | 160000 | 245 |
| 1  | 1  | 1  | 1  | 1  | 1  | 1  | 250000 | 246 |
| -1 | -1 | 1  | -1 | 1  | 1  | -1 | 80000  | 247 |
| -1 | -1 | -1 | -1 | -1 | 1  | -1 | 10000  | 248 |
| -1 | 1  | 1  | 1  | 1  | 1  | 1  | 120000 | 249 |
| -1 | -1 | -1 | 1  | -1 | -1 | -1 | 100000 | 250 |
| 1  | -1 | 1  | 1  | 1  | 1  | -1 | 100000 | 251 |
| 1  | 1  | 1  | 1  | 1  | 1  | 1  | 50000  | 252 |
| -1 | -1 | 1  | -1 | 1  | 1  | -1 | 80000  | 253 |
| -1 | -1 | 1  | -1 | -1 | 1  | -1 | 50000  | 254 |
| -1 | -1 | 1  | 1  | 1  | 1  | -1 | 150000 | 255 |
| 1  | -1 | 1  | -1 | 1  | 1  | 1  | 125000 | 256 |
| -1 | -1 | 1  | 1  | 1  | -1 | -1 | 120000 | 257 |
| -1 | -1 | -1 | -1 | -1 | -1 | -1 | 55000  | 258 |
| -1 | -1 | 1  | -1 | 1  | 1  | 1  | 100000 | 259 |
| 1  | -1 | 1  | 1  | 1  | 1  | -1 | 200000 | 260 |
| 1  | -1 | 1  | 1  | 1  | 1  | -1 | 40000  | 261 |
| -1 | -1 | 1  | -1 | 1  | 1  | -1 | 100000 | 262 |
| 1  | -1 | 1  | 1  | -1 | 1  | -1 | 140000 | 263 |
| -1 | -1 | -1 | 1  | 1  | 1  | -1 | 150000 | 264 |
| -1 | -1 | -1 | 1  | 1  | 1  | -1 | 150000 | 265 |
| -1 | -1 | -1 | 1  | 1  | 1  | -1 | 150000 | 266 |
| 1  | 1  | 1  | 1  | 1  | 1  | 1  | 90000  | 267 |
| 1  | -1 | 1  | 1  | 1  | 1  | -1 | 120000 | 268 |
| -1 | -1 | -1 | 1  | 1  | 1  | -1 | 150000 | 269 |
| -1 | 1  | -1 | 1  | 1  | -1 | -1 | 150000 | 270 |
| 1  | 1  | 1  | 1  | 1  | 1  | 1  | 90000  | 271 |
| 1  | 1  | 1  | 1  | 1  | 1  | -1 | 70000  | 272 |
| 1  | 1  | 1  | 1  | 1  | 1  | 1  | 200000 | 273 |
| 1  | -1 | 1  | -1 | 1  | 1  | 1  | 200000 | 274 |
| 1  | 1  | 1  | -1 | 1  | 1  | 1  | 150000 | 275 |
| 1  | 1  | 1  | 1  | 1  | 1  | 1  | 120000 | 276 |
| -1 | -1 | 1  | -1 | 1  | 1  | -1 | 150000 | 277 |
| 1  | 1  | 1  | 1  | -1 | 1  | -1 | 60000  | 278 |
| 1  | 1  | -1 | 1  | 1  | 1  | -1 | 140000 | 279 |
| -1 | -1 | 1  | -1 | 1  | 1  | -1 | 200000 | 280 |
| 1  | 1  | 1  | 1  | 1  | 1  | -1 | 150000 | 281 |



|    |    |    |    |    |    |    |        |     |
|----|----|----|----|----|----|----|--------|-----|
| -1 | -1 | 1  | -1 | 1  | 1  | -1 | 40000  | 329 |
| 1  | -1 | 1  | 1  | 1  | 1  | 1  | 40000  | 330 |
| 1  | 1  | -1 | -1 | -1 | -1 | -1 | 100000 | 331 |
| 1  | 1  | 1  | 1  | 1  | 1  | 1  | 100000 | 332 |
| -1 | 1  | 1  | 1  | 1  | 1  | 1  | 100000 | 333 |
| 1  | 1  | 1  | 1  | 1  | 1  | 1  | 100000 | 334 |
| -1 | -1 | 1  | -1 | 1  | 1  | -1 | 200000 | 335 |
| -1 | 1  | 1  | -1 | 1  | 1  | -1 | 183000 | 336 |
| 1  | -1 | -1 | -1 | 1  | 1  | -1 | 200000 | 337 |
| 1  | -1 | 1  | 1  | 1  | 1  | -1 | 140000 | 338 |
| 1  | -1 | -1 | -1 | 1  | -1 | -1 | 150000 | 339 |
| -1 | -1 | 1  | 1  | 1  | 1  | -1 | 100000 | 340 |
| -1 | -1 | -1 | -1 | -1 | -1 | 1  | 140000 | 341 |
| 1  | 1  | 1  | 1  | 1  | -1 | -1 | 100000 | 342 |
| -1 | 1  | 1  | 1  | 1  | -1 | 1  | 80000  | 343 |
| 1  | 1  | 1  | 1  | 1  | 1  | 1  | 50000  | 344 |
| 1  | 1  | -1 | 1  | 1  | -1 | -1 | 80000  | 345 |
| 1  | 1  | 1  | -1 | 1  | 1  | 1  | 150000 | 346 |
| 1  | -1 | 1  | 1  | 1  | 1  | -1 | 100000 | 347 |
| -1 | -1 | 1  | 1  | 1  | 1  | 1  | 150000 | 348 |
| 1  | -1 | 1  | -1 | 1  | 1  | 1  | 80000  | 349 |
| 1  | -1 | -1 | -1 | 1  | 1  | -1 | 20000  | 350 |
| 1  | -1 | 1  | 1  | 1  | 1  | -1 | 100000 | 351 |
| 1  | -1 | -1 | -1 | -1 | 1  | 1  | 100000 | 352 |
| 1  | -1 | -1 | -1 | 1  | -1 | 1  | 200000 | 353 |
| -1 | -1 | -1 | 1  | 1  | 1  | -1 | 30000  | 354 |
| 1  | -1 | -1 | 1  | -1 | 1  | 1  | 200000 | 355 |
| -1 | 1  | -1 | 1  | -1 | -1 | 1  | 100000 | 356 |
| 1  | 1  | 1  | 1  | 1  | 1  | -1 | 120000 | 357 |
| -1 | 1  | -1 | 1  | 1  | 1  | -1 | 80000  | 358 |
| 1  | 1  | 1  | 1  | 1  | 1  | 1  | 100000 | 359 |
| -1 | -1 | -1 | -1 | -1 | 1  | -1 | 200000 | 360 |
| 1  | 1  | 1  | -1 | 1  | -1 | -1 | 70000  | 361 |
| 1  | 1  | 1  | 1  | 1  | 1  | 1  | 200000 | 362 |
| 1  | 1  | 1  | 1  | 1  | 1  | 1  | 200000 | 363 |
| -1 | -1 | -1 | 1  | 1  | 1  | -1 | 50000  | 364 |
| 1  | 1  | 1  | 1  | 1  | -1 | 1  | 120000 | 365 |
| 1  | -1 | -1 | -1 | 1  | 1  | -1 | 50000  | 366 |
| 1  | 1  | 1  | 1  | 1  | 1  | 1  | 100000 | 367 |
| 1  | 1  | 1  | -1 | 1  | 1  | -1 | 100000 | 368 |
| 1  | -1 | 1  | -1 | 1  | 1  | -1 | 100000 | 369 |
| 1  | 1  | 1  | -1 | 1  | 1  | -1 | 60000  | 370 |
| -1 | -1 | 1  | -1 | 1  | 1  | 1  | 100000 | 371 |
| -1 | 1  | 1  | 1  | 1  | 1  | -1 | 150000 | 372 |
| 1  | 1  | 1  | 1  | 1  | -1 | -1 | 100000 | 373 |
| 1  | 1  | 1  | 1  | 1  | 1  | -1 | 100000 | 374 |
| 1  | 1  | 1  | 1  | 1  | -1 | 1  | 100000 | 375 |



|    |    |    |    |    |    |    |         |     |
|----|----|----|----|----|----|----|---------|-----|
| 1  | 1  | 1  | 1  | -1 | -1 | -1 | 175000  | 423 |
| 1  | 1  | 1  | 1  | 1  | 1  | 1  | 70000   | 424 |
| 1  | 1  | 1  | -1 | 1  | 1  | -1 | 30000   | 425 |
| 1  | 1  | 1  | -1 | 1  | 1  | -1 | 120000  | 426 |
| 1  | 1  | 1  | -1 | 1  | -1 | -1 | 100000  | 427 |
| 1  | 1  | 1  | 1  | 1  | 1  | 1  | 50000   | 428 |
| 1  | 1  | 1  | 1  | -1 | 1  | -1 | 150000  | 429 |
| -1 | 1  | 1  | 1  | 1  | 1  | 1  | 95000   | 430 |
| 1  | 1  | 1  | -1 | 1  | 1  | -1 | 100000  | 431 |
| -1 | -1 | -1 | 1  | 1  | 1  | -1 | 50000   | 432 |
| -1 | -1 | 1  | 1  | 1  | 1  | -1 | 85000   | 433 |
| -1 | -1 | -1 | -1 | 1  | 1  | 1  | 100000  | 434 |
| 1  | -1 | -1 | -1 | -1 | 1  | -1 | 80000   | 435 |
| -1 | 1  | 1  | -1 | 1  | 1  | -1 | 100000  | 436 |
| 1  | 1  | 1  | -1 | 1  | 1  | -1 | 200000  | 437 |
| 1  | -1 | -1 | 1  | 1  | 1  | -1 | 80000   | 438 |
| 1  | 1  | 1  | -1 | -1 | 1  | -1 | 100000  | 439 |
| -1 | -1 | -1 | -1 | 1  | -1 | -1 | 50000   | 440 |
| 1  | -1 | 1  | 1  | 1  | 1  | 1  | 150000  | 441 |
| 1  | -1 | 1  | 1  | 1  | 1  | -1 | 100000  | 442 |
| -1 | 1  | -1 | 1  | 1  | 1  | -1 | 200000  | 443 |
| -1 | -1 | 1  | 1  | 1  | 1  | -1 | 50000   | 444 |
| -1 | 1  | 1  | -1 | 1  | 1  | 1  | 120000  | 445 |
| -1 | -1 | -1 | -1 | -1 | 1  | -1 | 150000  | 446 |
| 1  | 1  | 1  | -1 | 1  | 1  | -1 | 100000  | 447 |
| -1 | -1 | 1  | -1 | -1 | 1  | -1 | 100000  | 448 |
| 1  | 1  | 1  | -1 | 1  | -1 | -1 | 150000  | 449 |
| 1  | 1  | 1  | 1  | 1  | -1 | -1 | 200000  | 450 |
| -1 | 1  | -1 | -1 | 1  | 1  | -1 | 200000  | 451 |
| -1 | 1  | 1  | 1  | 1  | 1  | -1 | 150000  | 452 |
| -1 | -1 | 1  | 1  | 1  | 1  | -1 | 50000   | 453 |
| -1 | -1 | 1  | -1 | -1 | 1  | -1 | 100000  | 454 |
| 1  | 1  | 1  | 1  | 1  | 1  | 1  | 50000   | 455 |
| 1  | -1 | -1 | 1  | -1 | 1  | -1 | 100000  | 456 |
| -1 | 1  | 1  | 1  | 1  | 1  | -1 | 130000  | 457 |
| 1  | 1  | 1  | 1  | 1  | 1  | 1  | 100000  | 458 |
| 1  | 1  | 1  | -1 | -1 | 1  | -1 | 70000   | 459 |
| -1 | -1 | 1  | -1 | -1 | 1  | -1 | 80000   | 460 |
| -1 | -1 | 1  | 1  | 1  | 1  | -1 | 125000  | 461 |
| 1  | -1 | 1  | 1  | 1  | 1  | -1 | 40000   | 462 |
| 1  | -1 | 1  | -1 | -1 | 1  | -1 | 50000   | 463 |
| 1  | 1  | 1  | 1  | 1  | -1 | -1 | 80000   | 464 |
| -1 | -1 | -1 | 1  | 1  | 1  | 1  | 100000  | 465 |
| 1  | 1  | 1  | 1  | 1  | 1  | 1  | 1000000 | 466 |
| -1 | -1 | 1  | -1 | 1  | 1  | -1 | 150000  | 467 |
| 1  | -1 | -1 | -1 | 1  | 1  | 1  | 80000   | 468 |
| 1  | -1 | 1  | 1  | 1  | 1  | -1 | 150000  | 469 |



|    |    |    |    |    |    |    |        |     |
|----|----|----|----|----|----|----|--------|-----|
| 1  | 1  | 1  | -1 | 1  | 1  | 1  | 50000  | 470 |
| -1 | 1  | 1  | 1  | 1  | 1  | -1 | 60000  | 471 |
| -1 | 1  | 1  | 1  | -1 | 1  | 1  | 50000  | 472 |
| 1  | 1  | 1  | 1  | 1  | 1  | 1  | 150000 | 473 |
| -1 | -1 | 1  | -1 | 1  | 1  | -1 | 100000 | 474 |
| 1  | -1 | 1  | 1  | -1 | 1  | 1  | 40000  | 475 |
| 1  | 1  | 1  | 1  | 1  | 1  | 1  | 80000  | 476 |
| 1  | 1  | 1  | 1  | 1  | 1  | -1 | 100000 | 477 |
| 1  | 1  | -1 | 1  | 1  | 1  | -1 | 150000 | 478 |
| -1 | 1  | -1 | 1  | 1  | 1  | -1 | 48000  | 479 |
| 1  | 1  | 1  | 1  | 1  | 1  | 1  | 160000 | 480 |
| 1  | -1 | 1  | 1  | -1 | 1  | 1  | 50000  | 481 |
| 1  | 1  | 1  | 1  | 1  | -1 | -1 | 200000 | 482 |
| 1  | 1  | -1 | 1  | 1  | -1 | -1 | 150000 | 483 |
| 1  | -1 | 1  | 1  | 1  | 1  | 1  | 80000  | 484 |
| 1  | 1  | 1  | 1  | -1 | 1  | -1 | 70000  | 485 |
| -1 | -1 | 1  | -1 | -1 | 1  | -1 | 100000 | 486 |
| 1  | 1  | 1  | 1  | -1 | 1  | -1 | 60000  | 487 |
| -1 | -1 | 1  | 1  | 1  | 1  | -1 | 150000 | 488 |
| 1  | -1 | -1 | -1 | -1 | 1  | -1 | 40000  | 489 |
| -1 | -1 | -1 | 1  | 1  | 1  | -1 | 100000 | 490 |
| 1  | 1  | 1  | 1  | 1  | -1 | 1  | 100000 | 491 |
| -1 | 1  | -1 | 1  | 1  | 1  | -1 | 100000 | 492 |
| 1  | -1 | 1  | 1  | 1  | 1  | 1  | 10000  | 493 |
| 1  | 1  | 1  | 1  | 1  | 1  | 1  | 100000 | 494 |
| 1  | -1 | 1  | 1  | 1  | 1  | -1 | 150000 | 495 |
| 1  | 1  | 1  | 1  | 1  | 1  | 1  | 100000 | 496 |
| -1 | -1 | 1  | -1 | 1  | 1  | -1 | 80000  | 497 |
| -1 | -1 | 1  | -1 | 1  | 1  | 1  | 500000 | 498 |
| -1 | -1 | 1  | -1 | 1  | 1  | 1  | 500000 | 499 |
| 1  | -1 | 1  | 1  | 1  | -1 | -1 | 200000 | 500 |
| -1 | 1  | -1 | -1 | -1 | 1  | -1 | 70000  | 501 |
| 1  | -1 | 1  | 1  | 1  | 1  | -1 | 100000 | 502 |
| 1  | 1  | 1  | 1  | 1  | 1  | 1  | 100000 | 503 |
| 1  | 1  | 1  | 1  | 1  | 1  | 1  | 200000 | 504 |
| 1  | 1  | 1  | -1 | 1  | 1  | 1  | 20000  | 505 |
| 1  | 1  | 1  | 1  | 1  | 1  | -1 | 50000  | 506 |
| -1 | -1 | -1 | -1 | -1 | 1  | -1 | 250000 | 507 |
| -1 | -1 | -1 | 1  | 1  | 1  | -1 | 80000  | 508 |
| 1  | 1  | 1  | 1  | 1  | 1  | 1  | 100000 | 509 |
| -1 | -1 | -1 | 1  | 1  | 1  | -1 | 80000  | 510 |
| 1  | -1 | -1 | -1 | 1  | 1  | -1 | 16000  | 511 |
| 1  | -1 | -1 | 1  | 1  | 1  | -1 | 150000 | 512 |
| -1 | -1 | 1  | 1  | -1 | 1  | -1 | 60000  | 513 |
| -1 | 1  | -1 | -1 | 1  | 1  | -1 | 100000 | 514 |
| 1  | 1  | 1  | -1 | 1  | 1  | 1  | 100000 | 515 |
| 1  | 1  | 1  | 1  | 1  | 1  | -1 | 40000  | 516 |

|    |    |    |    |    |    |    |        |     |
|----|----|----|----|----|----|----|--------|-----|
| 1  | -1 | -1 | -1 | 1  | -1 | 1  | 100000 | 517 |
| 1  | 1  | 1  | 1  | 1  | 1  | -1 | 110000 | 518 |
| -1 | -1 | 1  | 1  | 1  | 1  | 1  | 10000  | 519 |
| 1  | -1 | 1  | 1  | 1  | 1  | 1  | 20000  | 520 |
| -1 | 1  | 1  | 1  | 1  | 1  | -1 | 50000  | 521 |
| -1 | 1  | 1  | -1 | 1  | 1  | -1 | 100000 | 522 |
| 1  | 1  | -1 | 1  | 1  | 1  | 1  | 70000  | 523 |
| 1  | 1  | -1 | 1  | 1  | 1  | -1 | 100000 | 524 |
| 1  | 1  | 1  | 1  | 1  | 1  | 1  | 100000 | 525 |
| 1  | -1 | 1  | -1 | 1  | -1 | 1  | 10000  | 526 |
| -1 | -1 | 1  | 1  | 1  | 1  | 1  | 70000  | 527 |
| 1  | 1  | -1 | 1  | 1  | 1  | 1  | 150000 | 528 |
| -1 | -1 | 1  | -1 | 1  | 1  | 1  | 10000  | 529 |
| 1  | -1 | -1 | -1 | 1  | 1  | 1  | 300000 | 530 |
| -1 | 1  | -1 | 1  | 1  | 1  | -1 | 200000 | 531 |
| -1 | -1 | -1 | -1 | 1  | 1  | -1 | 100000 | 532 |
| -1 | 1  | -1 | 1  | 1  | -1 | 1  | 50000  | 533 |
| 1  | 1  | 1  | 1  | 1  | 1  | 1  | 50000  | 534 |
| 1  | -1 | 1  | 1  | 1  | 1  | -1 | 100000 | 535 |
| 1  | -1 | -1 | -1 | 1  | 1  | -1 | 100000 | 536 |
| 1  | 1  | 1  | -1 | 1  | 1  | 1  | 100000 | 537 |
| -1 | -1 | 1  | 1  | 1  | 1  | 1  | 50000  | 538 |
| -1 | -1 | 1  | 1  | 1  | 1  | -1 | 50000  | 539 |
| 1  | -1 | 1  | 1  | 1  | 1  | 1  | 100000 | 540 |
| -1 | -1 | 1  | 1  | 1  | -1 | 1  | 100000 | 541 |
| -1 | 1  | 1  | 1  | -1 | -1 | 1  | 120000 | 542 |
| -1 | 1  | 1  | 1  | -1 | -1 | -1 | 60000  | 543 |
| 1  | -1 | -1 | -1 | 1  | 1  | -1 | 40000  | 544 |
| -1 | 1  | -1 | -1 | 1  | -1 | 1  | 44000  | 545 |
| -1 | -1 | 1  | 1  | -1 | 1  | -1 | 80000  | 546 |
| -1 | 1  | -1 | -1 | -1 | 1  | 1  | 20000  | 547 |
| 1  | 1  | 1  | 1  | 1  | 1  | 1  | 33000  | 548 |
| -1 | -1 | -1 | -1 | -1 | -1 | -1 | 18000  | 549 |
| -1 | 1  | 1  | -1 | -1 | -1 | 1  | 12000  | 550 |
| -1 | 1  | 1  | -1 | 1  | 1  | -1 | 55000  | 551 |
| -1 | -1 | 1  | -1 | -1 | 1  | 1  | 66000  | 552 |
| -1 | -1 | -1 | 1  | -1 | 1  | -1 | 88000  | 553 |
| 1  | 1  | 1  | -1 | -1 | 1  | -1 | 180000 | 554 |
| -1 | -1 | -1 | 1  | -1 | 1  | -1 | 110000 | 555 |
| -1 | 1  | -1 | 1  | -1 | 1  | -1 | 11000  | 556 |
| -1 | -1 | -1 | -1 | -1 | 1  | 1  | 44000  | 557 |
| -1 | -1 | 1  | -1 | -1 | 1  | 1  | 156163 | 558 |
| 1  | 1  | 1  | 1  | 1  | 1  | -1 | 80000  | 559 |
| -1 | -1 | -1 | -1 | -1 | -1 | 1  | 161600 | 560 |
| -1 | -1 | -1 | -1 | -1 | -1 | -1 | 12000  | 561 |
| 1  | -1 | 1  | 1  | -1 | 1  | -1 | 150000 | 562 |
| -1 | 1  | 1  | 1  | 1  | 1  | -1 | 50000  | 563 |

|    |    |    |    |    |    |    |        |     |
|----|----|----|----|----|----|----|--------|-----|
| -1 | -1 | 1  | -1 | 1  | -1 | -1 | 100000 | 564 |
| 1  | 1  | 1  | 1  | 1  | -1 | -1 | 120000 | 565 |
| 1  | 1  | 1  | 1  | 1  | -1 | 1  | 200000 | 566 |
| -1 | -1 | 1  | 1  | 1  | 1  | 1  | 30000  | 567 |
| 1  | 1  | 1  | 1  | 1  | 1  | 1  | 70000  | 568 |
| -1 | 1  | 1  | -1 | 1  | 1  | 1  | 120000 | 569 |
| 1  | 1  | -1 | 1  | 1  | 1  | 1  | 100000 | 570 |
| 1  | -1 | 1  | 1  | 1  | 1  | 1  | 120000 | 571 |
| 1  | 1  | 1  | 1  | 1  | -1 | 1  | 100000 | 572 |
| 1  | 1  | 1  | 1  | 1  | 1  | -1 | 120000 | 573 |
| 1  | 1  | 1  | 1  | 1  | 1  | 1  | 70000  | 574 |
| 1  | 1  | 1  | -1 | -1 | 1  | -1 | 120000 | 575 |
| 1  | -1 | 1  | 1  | 1  | -1 | -1 | 20000  | 576 |
| -1 | 1  | 1  | 1  | 1  | 1  | 1  | 100000 | 577 |
| 1  | 1  | 1  | 1  | 1  | 1  | 1  | 70000  | 578 |
| 1  | -1 | 1  | -1 | 1  | -1 | -1 | 60000  | 579 |
| 1  | -1 | 1  | 1  | 1  | 1  | -1 | 11000  | 580 |
| -1 | -1 | 1  | 1  | 1  | -1 | -1 | 120000 | 581 |
| 1  | 1  | 1  | 1  | 1  | 1  | 1  | 100000 | 582 |
| 1  | 1  | 1  | 1  | 1  | 1  | 1  | 50000  | 583 |
| 1  | 1  | 1  | 1  | 1  | 1  | 1  | 100000 | 584 |
| 1  | -1 | 1  | 1  | 1  | 1  | -1 | 100000 | 585 |
| -1 | 1  | -1 | -1 | 1  | 1  | 1  | 140000 | 586 |
| 1  | 1  | 1  | 1  | 1  | 1  | 1  | 200000 | 587 |
| 1  | 1  | 1  | 1  | 1  | 1  | 1  | 120000 | 588 |
| 1  | -1 | 1  | 1  | 1  | 1  | 1  | 50000  | 589 |
| -1 | -1 | -1 | 1  | 1  | 1  | 1  | 100000 | 590 |
| 1  | -1 | 1  | -1 | -1 | 1  | 1  | 10000  | 591 |
| -1 | -1 | -1 | 1  | 1  | 1  | 1  | 100000 | 592 |
| -1 | -1 | -1 | -1 | -1 | -1 | -1 | 12000  | 593 |
| -1 | -1 | -1 | -1 | -1 | -1 | 1  | 13000  | 594 |
| 1  | -1 | -1 | 1  | 1  | -1 | -1 | 140000 | 595 |
| 1  | -1 | -1 | 1  | 1  | 1  | 1  | 18000  | 596 |
| 1  | -1 | 1  | 1  | 1  | 1  | -1 | 114000 | 597 |
| -1 | 1  | -1 | -1 | 1  | -1 | -1 | 130000 | 598 |
| -1 | -1 | -1 | 1  | 1  | -1 | -1 | 22000  | 599 |
| -1 | 1  | -1 | -1 | 1  | 1  | -1 | 100000 | 600 |
| 1  | -1 | -1 | 1  | 1  | -1 | -1 | 120000 | 601 |
| -1 | -1 | -1 | -1 | 1  | -1 | 1  | 140000 | 602 |
| 1  | 1  | 1  | 1  | 1  | -1 | -1 | 45000  | 603 |
| -1 | -1 | -1 | -1 | -1 | -1 | 1  | 60000  | 604 |
| -1 | -1 | 1  | 1  | 1  | 1  | -1 | 40000  | 605 |
| 1  | -1 | -1 | 1  | 1  | -1 | -1 | 50000  | 606 |
| 1  | 1  | -1 | 1  | 1  | 1  | -1 | 80000  | 607 |
| 1  | 1  | -1 | 1  | 1  | -1 | 1  | 30000  | 608 |
| -1 | -1 | 1  | -1 | -1 | -1 | 1  | 80000  | 609 |
| -1 | -1 | -1 | 1  | 1  | 1  | 1  | 60000  | 610 |

|    |    |    |    |    |    |    |        |     |
|----|----|----|----|----|----|----|--------|-----|
| 1  | 1  | 1  | 1  | 1  | -1 | 1  | 60000  | 611 |
| 1  | -1 | 1  | 1  | 1  | -1 | 1  | 45000  | 612 |
| 1  | 1  | -1 | 1  | -1 | -1 | 1  | 55000  | 613 |
| -1 | -1 | -1 | 1  | 1  | -1 | 1  | 90000  | 614 |
| -1 | -1 | -1 | -1 | -1 | -1 | -1 | 70000  | 615 |
| -1 | -1 | -1 | -1 | -1 | -1 | -1 | 77000  | 616 |
| 1  | -1 | 1  | 1  | -1 | 1  | 1  | 55000  | 617 |
| -1 | -1 | 1  | 1  | 1  | 1  | 1  | 50000  | 618 |
| -1 | -1 | 1  | 1  | 1  | 1  | -1 | 40000  | 619 |
| 1  | 1  | -1 | 1  | 1  | 1  | 1  | 200000 | 620 |
| -1 | -1 | -1 | -1 | -1 | 1  | 1  | 65000  | 621 |
| 1  | -1 | -1 | 1  | -1 | -1 | -1 | 40000  | 622 |
| 1  | 1  | 1  | 1  | 1  | 1  | -1 | 140000 | 623 |
| 1  | -1 | -1 | 1  | 1  | 1  | -1 | 130000 | 624 |
| -1 | -1 | -1 | -1 | -1 | -1 | -1 | 800000 | 625 |
| 1  | 1  | 1  | 1  | 1  | 1  | 1  | 700000 | 626 |
| 1  | 1  | 1  | -1 | 1  | 1  | -1 | 120000 | 627 |
| 1  | 1  | -1 | -1 | 1  | 1  | -1 | 300000 | 628 |
| -1 | 1  | -1 | -1 | 1  | -1 | -1 | 90000  | 629 |
| 1  | 1  | -1 | 1  | -1 | 1  | -1 | 175000 | 630 |
| 1  | 1  | 1  | 1  | 1  | -1 | -1 | 100000 | 631 |
| 1  | 1  | -1 | 1  | 1  | 1  | 1  | 200000 | 632 |
| 1  | 1  | 1  | 1  | 1  | 1  | 1  | 120000 | 633 |
| 1  | 1  | -1 | 1  | 1  | 1  | 1  | 150000 | 634 |
| 1  | -1 | -1 | 1  | 1  | 1  | 1  | 100000 | 635 |
| 1  | -1 | -1 | 1  | 1  | 1  | 1  | 150000 | 636 |
| 1  | 1  | 1  | 1  | 1  | 1  | 1  | 100000 | 637 |
| 1  | 1  | 1  | 1  | 1  | 1  | 1  | 200000 | 638 |
| 1  | 1  | 1  | 1  | 1  | -1 | 1  | 200000 | 639 |
